# Supplementary material
Source: PubMed Central journal article supplement (PMC4939079)

# Supplementary Data Set 1

## Figure 1a

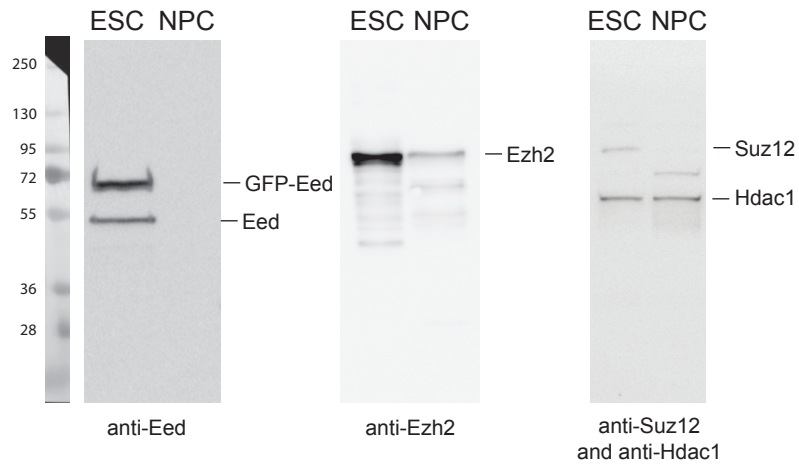

## Figure 2e

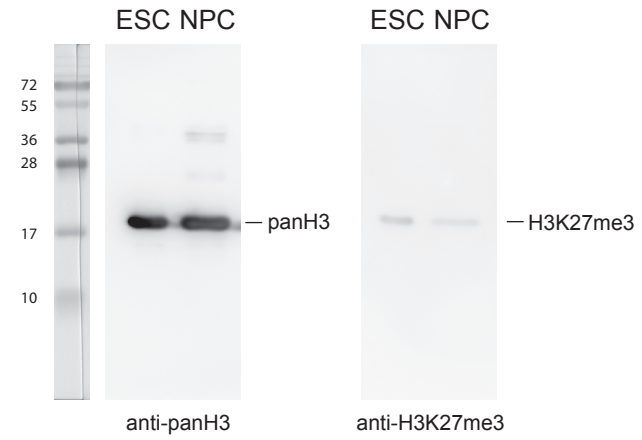

## Figure 4g

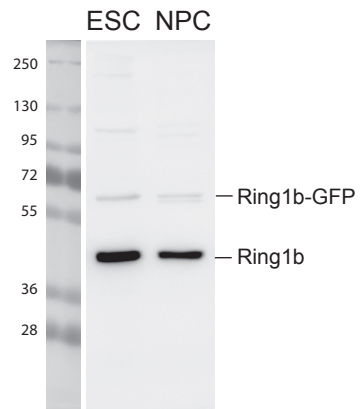

## Figure 6b

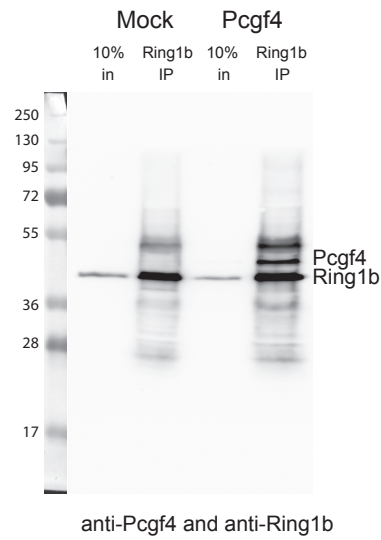

Supplement: NIHMS68592-supplement-Supplementary_Data_Set_1.pdf [file NIHMS68592-supplement-Supplementary_Data_Set_1.pdf]
